# Supplementary material
Source: bioRxiv or medRxiv preprint supplement (https://www.biorxiv.org/highwire/filestream/1573/field_highwire_adjunct_files/2/000992-3.pdf)
Supplement: Supplementary file [file 000992-3.pdf]

**Table S3: Oligonucleotide sequences used per sample.**

| Sample | Description        | oligo   | oligo sequence                                     |
|--------|--------------------|---------|----------------------------------------------------|
| 1      | CLL SF3B1<br>K700E | mp4PE2  | ACACTCTTTCCCTACACGACGCTCTTCCGATCT <u>TGACAT</u> *T |
|        |                    | mp4PE1  | [Phos]ATGTCAAGATCGGAAGAGCGGTTCAGCAGGAATGCC<br>GAG  |
| 2      | CLL SF3B1<br>K700E | mp15PE2 | ACACTCTTTCCCTACACGACGCTCTTCCGATCT <u>CGCCTG</u> *T |
|        |                    | mp15PE1 | [Phos]CAGGCGAGATCGGAAGAGCGGTTCAGCAGGAATGC<br>CGAG  |
| 3      | CLL                | mp30PE2 | ACACTCTTTCCCTACACGACGCTCTTCCGATCT <u>AAAGTG</u> *T |
|        |                    | mp30PE1 | [Phos]GCACTTAGATCGGAAGAGCGGTTCAGCAGGAATGCC<br>GAG  |
| 4      | CLL                | mp45PE2 | ACACTCTTTCCCTACACGACGCTCTTCCGATCT <u>CCAGCA</u> *T |
|        |                    | mp45PE1 | [Phos]TGCTGGAGATCGGAAGAGCGGTTCAGCAGGAATGC<br>CGAG  |
| 5      | control            | mp8PE2  | ACACTCTTTCCCTACACGACGCTCTTCCGATCT <u>CAAGTT</u> *T |
|        |                    | mp8PE1  | [Phos]AACTTGAGATCGGAAGAGCGGTTCAGCAGGAATGCC<br>GAG  |
| 6      | control            | mp16PE2 | ACACTCTTTCCCTACACGACGCTCTTCCGATCT <u>GCGTGG</u> *T |
|        |                    | mp16PE1 | [Phos]CCACGCAGATCGGAAGAGCGGTTCAGCAGGAATGC<br>CGAG  |

6 nt barcodes are underlined

[Phos] 5'Phosphorylation

\* s-linkage between the two bases

(Oligonucleotide sequences © 2006-2013 Illumina, Inc. All rights reserved.)
